# Supplementary material
Source: publisher site journal article supplement (https://www.dovepress.com/article/287875)

Figure S1. The level of miR-20b-5p in Non-diabetic and diabetic mice (n = 6 per group). Data are the mean  $\pm$  SD 3 independent experiments. \*p<0.05, \*\*p<0.01, \*\*\*p<0.001.

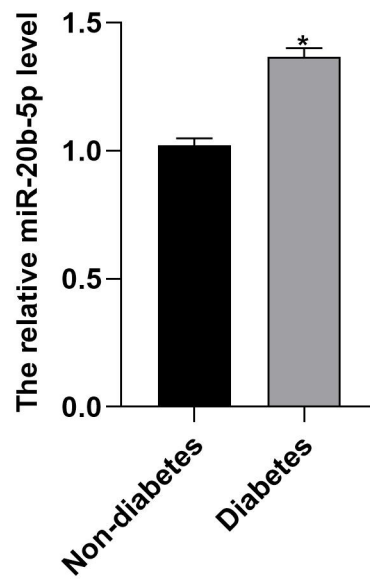

Figure S2. The level of miR-20b-5p in Con-Exos and Dia-Exos (n = 6 per group). Data are the mean  $\pm$  SD 3 independent experiments. \*p<0.05, \*\*p<0.01, \*\*\*p<0.001.

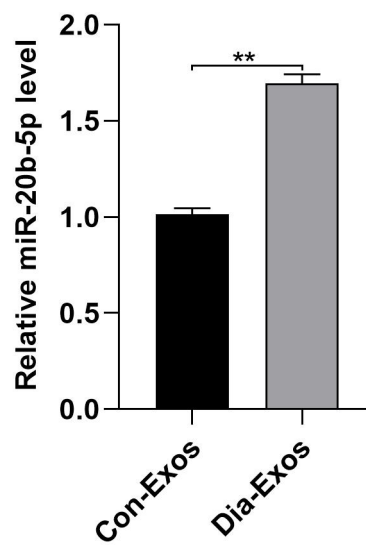

Supplement: Supplementary file 1 [file get_supplementary_file.php]
